# Supplementary material for: Prescribing trends of glaucoma drugs in six major cities of China from 2013 to 2017
Source: PubMed Central journal article supplement (PMC6957137; doi:10.1371/journal.pone.0227595), 2020-01-13
Supplement: pone.0227595.s002.pdf [file pone.0227595.s002.pdf]

**S1 Table. Brief hospital information of included hospitals.**

| Religion   | Cities    | Hospital description                                          |
|------------|-----------|---------------------------------------------------------------|
| East area  | Shanghai  | 11 tertiary hospitals, 5 secondary hospitals, all state owned |
|            | Hangzhou  | 9 tertiary hospitals, all state owned                         |
| North area | Beijing   | 9 tertiary hospitals, 2 secondary hospitals, all state owned  |
|            | Tianjing  | 6 tertiary hospitals, 1 secondary hospital, all state owned   |
| West area  | Chengdu   | 6 tertiary hospitals, all state owned                         |
| South area | Guangzhou | 7 tertiary hospitals, all state owned                         |
